# Supplementary material for: Molecular Characterization, Tissue Distribution and Differential Nutritional Regulation of Three n-3 LC-PUFA Biosynthesis-Related Genes in Hybrid Grouper (Epinephelus fuscoguttatus ♀ × Epinephelus lanceolatus ♂)
Source: Animals (Basel). 2022 Jan 19;12(3):234. doi: 10.3390/ani12030234 (PMC8833367; doi:10.3390/ani12030234)
Supplement: Supplementary file 1 [file animals-12-00234-s001.zip › animals-1515421-supplementary.pdf]

ACACTCATGTACTTGTCTATGCTATGGCTGGGCCCAAGTACATGAGACACAGACAGCCGATGTCTGCCAGGGC  
ACATTCATCTACCTTCTAATCTGCTGGATCGGCCCAAGTACATGAACACACAGCCGCTACTCTCCAGAGCC  
ATTCTAGCCTTCAACAATTAAAAAGGAGGAAGTACATACAAAGCTGTGTTATGTCCGAGGCACTCTGC  
ACAGTCAATGACACTTCTCATGCTGTGGATGGGCCCAAGTACATGAACACAGCCAGCCGCTACTCTCCAGAGCC  
ACAGTAATCTACCTTCTGATCTGCTGGATGGGCCCAAGTACATGAACACAGCCAGCCCTATTCTCCGAGGCC

CTCCTGCTGCTCTACAATCTGGCCCTCACTCTATTATCTTTCTATATGTTCTATGAGATGGTGTCTGCTGTGTGG  
CTCTGCTGCTTCTACAATCTGGCCCTCAACATCTGTCTCTCTACATGTTCTATGACGCTGTATACCCCGCTGTGG  
CTCTGCTGCTGTTCTTTACAGACATTTGATCTGTTGTTGAAAGACACAGCGCTGTGGAAGATCACTATTATGG  
CTCTGCTGCTCTACAATCTGGGCATCAACACTTGTGTTCTTACATGTTCTATGACGCTGTGTTCTGCTGTGTGG  
CTCTGCTGCTCTACAATCTGGCCCTCAACATCTGTCTTCTTCTACATGTTCTATGACGCTGTACTGCTGTGTGG  
TCCACTTCTGTGCACTGTGAGTGTCT

CAAGGGGTTATAACTTCTACTGCCAACACACACACATGCGGGGAAACAGATAACCAAGATCATAAATGTCGTG  
CACCGGTGGCTCAACATCTACTGCCAGACACTCACAATGTCACAGACAGTGGATAAATAGATCATAAATGTCGTG  
GCTGTGAGATGTATTAGAGAGATGCTGACGAGCGTGGACACAGACATTTAATCAACAGACAAATACGGCTGGC  
CACGGTGGTTACAACATTTTACTGCCAGACACTCACAATGTCACAGAACTGGATAAATAGATTATAAATGTCCTG  
CATGTCGGCTACAATTTTACTGCCAGACACTCACAATGTCACAGAACTGGATAAATAGATTATAAATGTCCTG  
CTACTGCCAGGACTCACA

TGGTGTACTACTTCTCCAAGTCATAGAGTTTATGGACCTTCTTCTTCATCTACGGAAGAACACCATCAG  
 TGGTGTACTACTTCTCCAAGCTCATGGATTCATGGACACATTTCTTCTCATCTACGGAAGTAATCAACACGAG  
 CCGGTATATCATCATATTATCTAAATTTGATGTTCTGT TGTCTAGACATTTGGATATCTTAAATCGTACATATG  
 TGGTGTGACTACTTCTCAAAGCTCATGGATTCATGGACACATTTTCTTCTCATCTACGGAAGTAATCAACATCAG  
 TGGTGTACTACTTCTCAACGCTGATTGATTCATGGACATTTTCTTCTCATCTACGGAAGTAATCAACGAG

ATCACGTTTCTGCACATCTACCACCACGCTAGCATGCTCAACATCTCGTGTTTCGTCATGAAGCTGGGTGCCCTCT  
ATCACGTTTCTGCACATCTACCACCACGCTAGCATGCTGAATATCTCGTGTTCTGTTATGAAGCTGGGTACCCCTG  
CTGTCTG. .CTGAATTAAAGGCTGATT. CAGCAAGTGATATAATTTTCTGAAGTACAGACAGATGTTCTCG  
ATCACATTCTGCACATCTACCACCACGCTAGCATGCTGAATATCTCGTGTTTGTATGAAGCTGATACCCCTG  
ATCACATTCTGCACATCTACCACCACGCTAGCATGCTGAATATCTCGTGTTTGTATGAAGCTGATACCCCTG

GGTCACTCTCACTT...TGGTGCCTCCCTCAACAGCTTGTCCATCTCTGTATG. TACTCTTACTATGGGCTCTCT  
GGCATCTCACTT...TGGCCGCTCTCAACAGCTCTGTCCACAGCTCTGTATG. TATTTCTTACTACGGCTCTCA  
CATTTTATTATCTCACTTACTTACTTACTCATATATATCCCTTACTCATGATATATCAATATTAAG. CTGT  
GGCATCTCACTT...TGGTGCATCTCGAACAGCTTGTCCACAGCTGTGTATG. TATTCCTACTACGGCTCTCA  
GGCATCTCTCACTT...CGGTGCATCTCTCAACAGCTTGTCCACAGCTGTGTATG. TATTTCTTACTACGGCTCTCA  
  
GAGGCGCCAAAGTATGATG

GCTGTCCTCCGGCCATACGCCCTATCTATGGTGAAGAA...ATATATCACACAAGGCCAGCTGATTC AATTCTTT  
 GCATCCAGCCAGCATTCGCCGGCTACCTTTGGTGAAGAA...GTACATACACAGCTTTCAAGCTATCCAGCTTTT  
 ATTGTCAAAAATTTATTTCAATTTTCCATTAATTCAGCCCTAGACATGATGATATGTATCAAAAAGACACAGTT  
 TCCATCCAGCCAGCTGCGCCCATACCTTTGGTGAAGAA...ATACATACAGCACTTACAGCTGATCCAGCTTTCTT  
 GCATTCAGCCAGCATGGCGCGTACTTTGGTGAAGAA...ATACATACACAGCTTACAGCTGATCCAGCTTTCTT

TTGACCATGTCCAGACCATCTGTGCAGTCATTTGGCCATGTGGTTTCCCAGAGGCTGGCTGTTTTCCAAAT  
 TTAACCATGTCCGACAGATGTCCGGCTCATATGCCCATCGCGCTTCCCAGGAGTGCGCTCATCTCCAAATA  
 TTAATTATGATCTATT11TTAATATCTCATAGATTAATCAGAA1TACACAGAAAGTGTGTCATCATCACTTC  
 TTAACCATGTCCAGACAATGTGCAGTCATATGCCCATGTGCTTCCCACGGATGGCTGTACTTCCAAATA  
 TTGACATGTCCGACAGCAATGTGTCTGCATATGCCCATGTGAT1TTCCCCAGAGATGGCTATCTTCCAAAT

TTCTATATGGCTCGCTTAATGCCCTTTTCTCAAACCTCTACATCTCAGACTTACAAGAAACACCGTGTTCACAA  
 AGTTACATGCTCACACTCATCTCTCTCTCTCAAACCTCTACAGTCTCAGACTTACAAGAACGACACCTGCTCTCTCA  
 CCCTTCAGCCCTCATTAGGCACGATAATTAAGGATTAATACTACTTCAAGTCGCAATTAACAATCTTTTCTACA  
 AGTTACATGCTCACCCCTATTCTCTTCTCAAACCTCTACATCTCAGACTTACAAGAACGACACCTGCTCTCCTA  
 AGTTACATGCTCACACTCATCTCTCTCTCAAACCTCTACATCTCAGACGTACAAGAACACAGCTGCTCTCTA  
 CACACTCATCTCTCTCTCTCTCAAACCT GTGCTCTCTGTGAAGCTCGA

GTGTCCTGTCTGTGCACCAGAGGATAGTGAACAATGGAGACAAGAGGACGGACCCATGGCTGCTGGTCTACTCC  
GTGTCCTGTCTGTGCACCAGAGGATAGTGGACAATGGAGACAAGAGGACTGACCCGTGGCTGCTGGTCTACTCC  
CGCTTCAGTCCATCGCCAGTGGATTTAGAGAATGGAGATAAAGGACAGACCCATGGCTACTGGTCTACTCC

CCGTCCCGGTGGCACTCATCTTCTAGTGTACCTCTGTGTGGTCTGGGCGGGCCCTCGTCTGATGAAACACAGAG  
CCGTCCCGGTGTCACTCATCTTTCTGGTTTACCTCTGTGTGGTCTGGGCGGGCCCTCGCCTGATGAAACCGAGG  
CCATGCCAGTGGCCTTATATTCTCTCTATCTTGTGTGGTCTGGGCTGGGCCAAGCTGATGAAACCGAGG

AACCGTTGACCTCAAAGTGGTTCATTGTTACAACCTTGCCATGGTCGGCTGTCTGCCTATATGTGCTATG  
AACCGTTGACCTCAAAGTGGTTCATTGTTACAACCTTGCCATGGTCGGCTGTCTGCCACATGTTCTATG  
AACCGTTGATCTCAAGGCTGACTCATTGTCTACAACCTTGCCATGGTCGCCTGTCTGTCTACATGTTCCACG

AGTTCTCGTGCATCCTGGCTCTCGAGCTACAGCCTCCTCTGTGAGCCTGTAGATTACAGCACCACCCGCTAG  
AGTTCTCGTCACTTCATGGCTCTCAAACTACAGCTACCTCTGTGAGCCTGTAGATTACAGCACCAGCCACTGG  
AGTTCTTGGTCACGTCCTTGCTGTCTAACTACAGTTACCTGTGTCAACCTGTGGATTACAGCTAGTCCACTGG

CATTGAGGATGGCCAGAGTCTGCTGGTGGTTCTTCTCTCTAAGGTCATAGAGCTCAGTGACACCATCTTCTTCA  
CGATGAGGATGGCCAGAGTCTGCTGGTGGTTTTCTTCTCCAAGGTGATCGAGCTCTCTGACACGCTCTTCTTCA  
CGATGAGGATGGCCAAAGTATGCTGGTGGTTTTCTTCTCCAAGGTCATAGAATTGGCTGACACGGTGTCTTCA

TTCTGAGGAAGAAGAACAGCCAGCTGACGTTCTTCATGTTACCAACACGGCACCATGATCTTCAACTGGTGG  
TCCTGAGGAAGAAGAACAGTCACTGACTTTCTTCATGTCTACCAACACGGCACCATGATCTTCAACTGGTGG  
TCCTGAGGAAGAAGAACAGTCACTGACTTTCTGCATGTCTATCACCATGGCACCATGATCTTCAACTGGTGG

CGGGAGTCAAGTACGTGGCCGGCGGACAGTCGTTCTTCATCGGCCTGGTCAACACCTTACTTCACATCGTGATGT  
CGGGAGTCAAGTACGTGCTGGAGGACAGTCGTTCTTCATTGGCCTGGTCAACACCTTTTCTCACATACTGATGT  
CAGGGGTCAAGTATCTGCTGGAGGCCAATCGTTCTTCATCGGCCTGCTCAATACCTTTCTGCACATCGTGATGT

ATTCTTACTACGGCCTGGCTGCGCTCGGCCCTCACATGCAGAAGTACCTGTGGTGAAGAGATACCTCACCTCTC  
ACTCTTACTACGGCCTGGCAGCGATCGGCCCTCACATGCAGAAGTACCTGTGGTGAAGAGATACCTCACCTCTC  
ACTCTTACTACGGACTGGCTGCCCTGGGGCCTCACACGCAGAAGTACTTATGGTGAAGCGCTATCTGACCTCGC

TGCAGCTGGTGCAGTTTGTGCTGTTCTCCTGCACACGGGCTACAACCTGTTACAGAGTGCAGCTTCCCCGACT  
TGCAGCTGCTGCAGTTTCTGATGTTCTTGTGCACACGGGCTACAACCTGTTACAGAGTGTGACTTCCCCGACA  
TGCAGCTGCTCCAGTTTGTCTGTTGACCACTCACACTGGCTACAACCTTTCACTGAGTGTGACTTCCCAGACT

CCATGAACGTGGTGGTGTGGTAACTGCGTCACCTCATCATCCTCTTCAGTAACTTCTATTTTCAGAGCTACC  
CCATGAACATGGTGGTGTGGTAACTGCGTCACCTCATCATCCTCTTCAGTAACTTCTATTATCAGAGCTACC  
CCATGAATGCTGGTGGTGTGGCTACTGTGTCAGTTCATTGCTCTCTTCAGCAACTTCTACTATCAGAGCTACC

TCACAAGAAGA...AGCAGAAATAAGACACA...GTGATTGTGGAGCTTA.....TGAAACTGAAC. AG  
TCACGAAGAAGA...AGCAGAAATAAGATGCA...ATGCTGAGCCCTTGACA.....CACAAATCGAAC. AC  
TCACAGGAAGAGTAAGAAGACATAAAGGATATGGACAATCATGCACTCACAGTCTCTTCTCGACCTGAATTAA

|                                                                                                                              |                                                                                                                                                                                                                                                                                                                                                                                                                                                                                                                                                                                                                                                                                                                                                                                                                                                                                                                                                                                                                                                                                                                                                                                                                                                                                                                                                                                                                                                                                                                                                                                                                                                                                                                                                                                                                                                                                                                                                                                                                                                                                                                                                                                                                                                                                                                                                                                                                                                                                                                                                                                          |
|------------------------------------------------------------------------------------------------------------------------------|------------------------------------------------------------------------------------------------------------------------------------------------------------------------------------------------------------------------------------------------------------------------------------------------------------------------------------------------------------------------------------------------------------------------------------------------------------------------------------------------------------------------------------------------------------------------------------------------------------------------------------------------------------------------------------------------------------------------------------------------------------------------------------------------------------------------------------------------------------------------------------------------------------------------------------------------------------------------------------------------------------------------------------------------------------------------------------------------------------------------------------------------------------------------------------------------------------------------------------------------------------------------------------------------------------------------------------------------------------------------------------------------------------------------------------------------------------------------------------------------------------------------------------------------------------------------------------------------------------------------------------------------------------------------------------------------------------------------------------------------------------------------------------------------------------------------------------------------------------------------------------------------------------------------------------------------------------------------------------------------------------------------------------------------------------------------------------------------------------------------------------------------------------------------------------------------------------------------------------------------------------------------------------------------------------------------------------------------------------------------------------------------------------------------------------------------------------------------------------------------------------------------------------------------------------------------------------------|
| Trachinotus ovatus fads2 MG674449.1<br>Epinephelus coioides fads2 EU715405.1<br>Epinephelus lanceolatus fads2 XM 033635131.1 | <pre> ATGGGAGGTGGAGTCACTGACGGAG.....GGCCGAGCTGGAGGTGTCTACACCTGGGA GATGGGAGGTGGAGTCCAGCTGACGGAGCCAGGGAGCAGGGAGTGGCCGGCTGGTGTCTACACCTGGGA GATGGGAGGTGGAGTCCAGCTGACGGAGCCAGGGAGCAGGGAGTGGCCGGCTGGTGTCTACACCTGGGA CCAGGTGGAGGCGAGAAGAACA GGAGGTGCAGAGTCACAATATCAGGAACGACCAGTGGCTGGTCATAGACCGGAAAGGTTTACAACATCACTCAGTG GGAGGTGCAGAGTCACTGCGACAGGAATGACCAGTGGCTGGTCATCGGAAAGGTTTACAACATCACACAGTG GGAGGTGCAGAGTCACTGCGACAGGAATGACCAGTGGCTGGTCATCGGAAAGGTTTACAACATCACACAGTG CACTACGCTGGAGAGGATG GCCCCAAAGCGATCCAGGAGCCTTTCGTGTCTGACCTACTATGCTGGAGAGGACCCACAGAGCCCTTTCAGTGC GCTTAAAGGCCACCCAGGAGGATCCGGTTCATGACCTACTATGCTGGAGAGGATCCACGGAGCCCTTTCACCCG GCTTAAAGGCCACCCAGGAGGATCCGGTTCATGACCTACTATGCTGGAGAGGATCCACGGAGCCCTTTCACCCG AGCCACTATGCTGGAGAGGATG CTCGGTGGCATCTCTCCAGCGTAGT TTTTCATCTCTGATCCAACTTTTGTACAAAAGTTTCTGAAGCCCTTCGACATTGTTGAGCTGGCAGCGACAGAGCC TTTTCATCTCTGATTTAAAGTTTGTGCAAAAGTTTCTGAAGCCCTTCGTCATCGGAGAGCTGGCAGCGACAGAGCC TTTTCATCTCTGATTTAAAGTTTGTGCAAAAGTTTCTGAAGCCCTTCGTCATCGGAGAGCTGGCAGCGACAGAGCC CAGCCAGGACCGGACAAAATGCAGCAATCATACAGGATTTCCACACTTTTACGTCGACAGCGACAGAGCGAGGG CAGCCAGGACCGGACAAAACGCAACATCATACAAGATTTCCACACTTTACGGGTGCAGCGGAGAGGAGGG TCTGTTTTCGAGCTCGGCCTTTGTTCTTCTGCTCCACCTGGGTACATCATGCTGCTGGAGGCCCTTCGCTGGCT TTTGTTTTCAAGCTCGGCCTTTGTTCTTCTGCTCCACCTGGGTACATCTCTGCTGAGGCCCTTCGCTGGCT TTTGTTTTCAAGCTCGGCCTTTGTTCTTCTGCTCCACCTGGGTACATCTCTGCTGAGGCCCTTCGCTGGCT GATGATATGGCACTGGGAACTAACTGGATCTGACGCTTCTGCTGCGGTCTGCTGCAACCGCTCAG...CA CATCATTTGGCTCTGGGAACCACTGGAGCTGACGTTTCTGATCTCCGTCATGCTGGCGACCGCTCAGTTGCA CATCATCTGGGTCTGGGAACCACTGGAGCTGACGTTTCTGATCTCTCATGCTGCGACCGCTCAGTTGCA GCTGCTTGGTCCAGCACCACTTCGGCCACCTCTCTCTTTCAAGAACTCCGCTTGAATCACTTCTTCCACAA GCTTGGATGGTCCAGCACCACTTCGGCCACCTCTCTCTTTCAAGAACTCCAGCTGCAATCACATATTGCACAA GCTTGGATGGTCCAGCACCACTTCGGCCACCTCTCTCTTTCAAGAACTCCAGCTGCAATCACATATTGCACAA GTTACCATCGGCCATTTAAAGGAGCTTCTGCCAACTGGTGAATCATCGACATTTCCAGCATCATGCTAAACC GTTTGGCATTTGCCATTTGAAGGAGCGCTCTGCCAACTGGTGAATCACCAGCATTTCCAGCATCAGCTAAACC GTTTGGCATCGGCCATTTGAAGGAGCATCTGCCAACTGGTGAATCACCAGCATTTCCAGCATCAGCTAAACC CATTTCAGCATCAGCTAAACCAAC CAATCTCTTCAGGAAGGACCTGATGTCAACATGTTGAGTATTTTGTGTTGGATCCACTCAACCTGTGGAGTA CAACATCTTCAGTAAGGACCTGATGTCAACATGTTGACATCTTTGAGTTGGAACCACTCAACAGTGGAGTA CAACATCTTCAGTAAGGACCTGATGTCAACATGTTGACATCTTTGAGTTGGAACCACTCAACAGTGGAGTA TGGCATAAAAAAGATCAAAACACATGCTCTACCATCACAACACCACTACTTCTTTCTTCTGGGACCAACCGCTACT CGGCATAAAGAGATTAATATATGCTCTATCATCACAACACCACTACTTCTTTCTTCTTGGACCAACCGCTGCT CGGCATAAAGAGATTAATATATGCTCTATCATCACAACACCACTACTTCTTTCTTCTTGGACCAACCGCTGCT TGGTGTGGTGATGATAGG </pre> |
| Trachinotus ovatus fads2 MG674449.1<br>Epinephelus coioides fads2 EU715405.1<br>Epinephelus lanceolatus fads2 XM 033635131.1 | <pre> GGAGGTGCAGAGTCACAATATCAGGAACGACCAGTGGCTGGTCATAGACCGGAAAGGTTTACAACATCACTCAGTG GGAGGTGCAGAGTCACTGCGACAGGAATGACCAGTGGCTGGTCATCGGAAAGGTTTACAACATCACACAGTG GGAGGTGCAGAGTCACTGCGACAGGAATGACCAGTGGCTGGTCATCGGAAAGGTTTACAACATCACACAGTG CACTACGCTGGAGAGGATG GCCCCAAAGCGATCCAGGAGCCTTTCGTGTCTGACCTACTATGCTGGAGAGGACCCACAGAGCCCTTTCAGTGC GCTTAAAGGCCACCCAGGAGGATCCGGTTCATGACCTACTATGCTGGAGAGGATCCACGGAGCCCTTTCACCCG GCTTAAAGGCCACCCAGGAGGATCCGGTTCATGACCTACTATGCTGGAGAGGATCCACGGAGCCCTTTCACCCG AGCCACTATGCTGGAGAGGATG CTCGGTGGCATCTCTCCAGCGTAGT TTTTCATCTCTGATCCAACTTTTGTACAAAAGTTTCTGAAGCCCTTCGACATTGTTGAGCTGGCAGCGACAGAGCC TTTTCATCTCTGATTTAAAGTTTGTGCAAAAGTTTCTGAAGCCCTTCGTCATCGGAGAGCTGGCAGCGACAGAGCC TTTTCATCTCTGATTTAAAGTTTGTGCAAAAGTTTCTGAAGCCCTTCGTCATCGGAGAGCTGGCAGCGACAGAGCC CAGCCAGGACCGGACAAAATGCAGCAATCATACAGGATTTCCACACTTTTACGTCGACAGCGACAGAGCGAGGG CAGCCAGGACCGGACAAAACGCAACATCATACAAGATTTCCACACTTTACGGGTGCAGCGGAGAGGAGGG TCTGTTTTCGAGCTCGGCCTTTGTTCTTCTGCTCCACCTGGGTACATCATGCTGCTGGAGGCCCTTCGCTGGCT TTTGTTTTCAAGCTCGGCCTTTGTTCTTCTGCTCCACCTGGGTACATCTCTGCTGAGGCCCTTCGCTGGCT TTTGTTTTCAAGCTCGGCCTTTGTTCTTCTGCTCCACCTGGGTACATCTCTGCTGAGGCCCTTCGCTGGCT GATGATATGGCACTGGGAACTAACTGGATCTGACGCTTCTGCTGCGGTCTGCTGCAACCGCTCAG...CA CATCATTTGGCTCTGGGAACCACTGGAGCTGACGTTTCTGATCTCCGTCATGCTGGCGACCGCTCAGTTGCA CATCATCTGGGTCTGGGAACCACTGGAGCTGACGTTTCTGATCTCTCATGCTGCGACCGCTCAGTTGCA GCTGCTTGGTCCAGCACCACTTCGGCCACCTCTCTCTTTCAAGAACTCCGCTTGAATCACTTCTTCCACAA GCTTGGATGGTCCAGCACCACTTCGGCCACCTCTCTCTTTCAAGAACTCCAGCTGCAATCACATATTGCACAA GCTTGGATGGTCCAGCACCACTTCGGCCACCTCTCTCTTTCAAGAACTCCAGCTGCAATCACATATTGCACAA GTTACCATCGGCCATTTAAAGGAGCTTCTGCCAACTGGTGAATCATCGACATTTCCAGCATCATGCTAAACC GTTTGGCATTTGCCATTTGAAGGAGCGCTCTGCCAACTGGTGAATCACCAGCATTTCCAGCATCAGCTAAACC GTTTGGCATCGGCCATTTGAAGGAGCATCTGCCAACTGGTGAATCACCAGCATTTCCAGCATCAGCTAAACC CATTTCAGCATCAGCTAAACCAAC CAATCTCTTCAGGAAGGACCTGATGTCAACATGTTGAGTATTTTGTGTTGGATCCACTCAACCTGTGGAGTA CAACATCTTCAGTAAGGACCTGATGTCAACATGTTGACATCTTTGAGTTGGAACCACTCAACAGTGGAGTA CAACATCTTCAGTAAGGACCTGATGTCAACATGTTGACATCTTTGAGTTGGAACCACTCAACAGTGGAGTA TGGCATAAAAAAGATCAAAACACATGCTCTACCATCACAACACCACTACTTCTTTCTTCTGGGACCAACCGCTACT CGGCATAAAGAGATTAATATATGCTCTATCATCACAACACCACTACTTCTTTCTTCTTGGACCAACCGCTGCT CGGCATAAAGAGATTAATATATGCTCTATCATCACAACACCACTACTTCTTTCTTCTTGGACCAACCGCTGCT TGGTGTGGTGATGATAGG </pre>                                                                                                                                                                                                                                |
| Trachinotus ovatus fads2 MG674449.1<br>Epinephelus coioides fads2 EU715405.1<br>Epinephelus lanceolatus fads2 XM 033635131.1 | <pre> CAGCCAGGACCGGACAAAATGCAGCAATCATACAGGATTTCCACACTTTTACGTCGACAGCGACAGAGCGAGGG CAGCCAGGACCGGACAAAACGCAACATCATACAAGATTTCCACACTTTACGGGTGCAGCGGAGAGGAGGG CAGCCAGGACCGGACAAAACGCAACATCATACAAGATTTCCACACTTTACGGGTGCAGCGGAGAGGAGGG TCTGTTTTCGAGCTCGGCCTTTGTTCTTCTGCTCCACCTGGGTACATCATGCTGCTGGAGGCCCTTCGCTGGCT TTTGTTTTCAAGCTCGGCCTTTGTTCTTCTGCTCCACCTGGGTACATCTCTGCTGAGGCCCTTCGCTGGCT TTTGTTTTCAAGCTCGGCCTTTGTTCTTCTGCTCCACCTGGGTACATCTCTGCTGAGGCCCTTCGCTGGCT GATGATATGGCACTGGGAACTAACTGGATCTGACGCTTCTGCTGCGGTCTGCTGCAACCGCTCAG...CA CATCATTTGGCTCTGGGAACCACTGGAGCTGACGTTTCTGATCTCCGTCATGCTGGCGACCGCTCAGTTGCA CATCATCTGGGTCTGGGAACCACTGGAGCTGACGTTTCTGATCTCTCATGCTGCGACCGCTCAGTTGCA GCTGCTTGGTCCAGCACCACTTCGGCCACCTCTCTCTTTCAAGAACTCCGCTTGAATCACTTCTTCCACAA GCTTGGATGGTCCAGCACCACTTCGGCCACCTCTCTCTTTCAAGAACTCCAGCTGCAATCACATATTGCACAA GCTTGGATGGTCCAGCACCACTTCGGCCACCTCTCTCTTTCAAGAACTCCAGCTGCAATCACATATTGCACAA GTTACCATCGGCCATTTAAAGGAGCTTCTGCCAACTGGTGAATCATCGACATTTCCAGCATCATGCTAAACC GTTTGGCATTTGCCATTTGAAGGAGCGCTCTGCCAACTGGTGAATCACCAGCATTTCCAGCATCAGCTAAACC GTTTGGCATCGGCCATTTGAAGGAGCATCTGCCAACTGGTGAATCACCAGCATTTCCAGCATCAGCTAAACC CATTTCAGCATCAGCTAAACCAAC CAATCTCTTCAGGAAGGACCTGATGTCAACATGTTGAGTATTTTGTGTTGGATCCACTCAACCTGTGGAGTA CAACATCTTCAGTAAGGACCTGATGTCAACATGTTGACATCTTTGAGTTGGAACCACTCAACAGTGGAGTA CAACATCTTCAGTAAGGACCTGATGTCAACATGTTGACATCTTTGAGTTGGAACCACTCAACAGTGGAGTA TGGCATAAAAAAGATCAAAACACATGCTCTACCATCACAACACCACTACTTCTTTCTTCTGGGACCAACCGCTACT CGGCATAAAGAGATTAATATATGCTCTATCATCACAACACCACTACTTCTTTCTTCTTGGACCAACCGCTGCT CGGCATAAAGAGATTAATATATGCTCTATCATCACAACACCACTACTTCTTTCTTCTTGGACCAACCGCTGCT TGGTGTGGTGATGATAGG </pre>                                                                                                                                                                                                                                                                                                                                                                                                                                                                                                                                                                                                                                                                                                                                                                                                                                                                                                                                     |
| Trachinotus ovatus fads2 MG674449.1<br>Epinephelus coioides fads2 EU715405.1<br>Epinephelus lanceolatus fads2 XM 033635131.1 | <pre> GATGATATGGCACTGGGAACTAACTGGATCTGACGCTTCTGCTGCGGTCTGCTGCAACCGCTCAG...CA CATCATTTGGCTCTGGGAACCACTGGAGCTGACGTTTCTGATCTCCGTCATGCTGGCGACCGCTCAGTTGCA CATCATCTGGGTCTGGGAACCACTGGAGCTGACGTTTCTGATCTCTCATGCTGCGACCGCTCAGTTGCA GCTGCTTGGTCCAGCACCACTTCGGCCACCTCTCTCTTTCAAGAACTCCGCTTGAATCACTTCTTCCACAA GCTTGGATGGTCCAGCACCACTTCGGCCACCTCTCTCTTTCAAGAACTCCAGCTGCAATCACATATTGCACAA GCTTGGATGGTCCAGCACCACTTCGGCCACCTCTCTCTTTCAAGAACTCCAGCTGCAATCACATATTGCACAA GTTACCATCGGCCATTTAAAGGAGCTTCTGCCAACTGGTGAATCATCGACATTTCCAGCATCATGCTAAACC GTTTGGCATTTGCCATTTGAAGGAGCGCTCTGCCAACTGGTGAATCACCAGCATTTCCAGCATCAGCTAAACC GTTTGGCATCGGCCATTTGAAGGAGCATCTGCCAACTGGTGAATCACCAGCATTTCCAGCATCAGCTAAACC CATTTCAGCATCAGCTAAACCAAC CAATCTCTTCAGGAAGGACCTGATGTCAACATGTTGAGTATTTTGTGTTGGATCCACTCAACCTGTGGAGTA CAACATCTTCAGTAAGGACCTGATGTCAACATGTTGACATCTTTGAGTTGGAACCACTCAACAGTGGAGTA CAACATCTTCAGTAAGGACCTGATGTCAACATGTTGACATCTTTGAGTTGGAACCACTCAACAGTGGAGTA TGGCATAAAAAAGATCAAAACACATGCTCTACCATCACAACACCACTACTTCTTTCTTCTGGGACCAACCGCTACT CGGCATAAAGAGATTAATATATGCTCTATCATCACAACACCACTACTTCTTTCTTCTTGGACCAACCGCTGCT CGGCATAAAGAGATTAATATATGCTCTATCATCACAACACCACTACTTCTTTCTTCTTGGACCAACCGCTGCT TGGTGTGGTGATGATAGG </pre>                                                                                                                                                                                                                                                                                                                                                                                                                                                                                                                                                                                                                                                                                                                                                                                                                                                                                                                                                                                                                                                                                                                                                                                                                                                                                                                                                                                         |

**Figure S1.** Multiple Sequence Alignment of *elovl5*, *elovl8* and *fads2* genes used for primer design. The design sequence of the primers is marked with square.

# MX: Analysis Preferences

| Phylogeny Reconstruction          |                                                             |
|-----------------------------------|-------------------------------------------------------------|
| Option                            | Setting                                                     |
| <b>ANALYSIS</b>                   |                                                             |
| Statistical Method →              | <i>Maximum Likelihood</i>                                   |
| <b>PHYLOGENY TEST</b>             |                                                             |
| Test of Phylogeny →               | <i>Bootstrap method</i>                                     |
| No. of Bootstrap Replications →   | <i>1000</i>                                                 |
| <b>SUBSTITUTION MODEL</b>         |                                                             |
| Substitutions Type →              | <i>Amino acid</i>                                           |
| Model/Method →                    | <i>LG model</i>                                             |
| <b>RATES AND PATTERNS</b>         |                                                             |
| Rates among Sites →               | <i>Gamma Distributed (G)</i>                                |
| No of Discrete Gamma Categories → | <i>5</i>                                                    |
| <b>DATA SUBSET TO USE</b>         |                                                             |
| Gaps/Missing Data Treatment →     | <i>Use all sites</i>                                        |
| Site Coverage Cutoff (%) →        | <i>Not Applicable</i>                                       |
| <b>TREE INFERENCE OPTIONS</b>     |                                                             |
| ML Heuristic Method →             | <i>Nearest-Neighbor-Interchange (NNI)</i>                   |
| Initial Tree for ML →             | <i>Make initial tree automatically (Default - NJ/BioNJ)</i> |
| Initial Tree File →               | <i>Not Applicable</i>                                       |
| Branch Swap Filter →              | <i>None</i>                                                 |
| <b>SYSTEM RESOURCE USAGE</b>      |                                                             |
| Number of Threads →               | <i>10</i>                                                   |

ⓘ Help
✕ Cancel
✓ OK

Figure S2. Maximum likelihood method parameters.

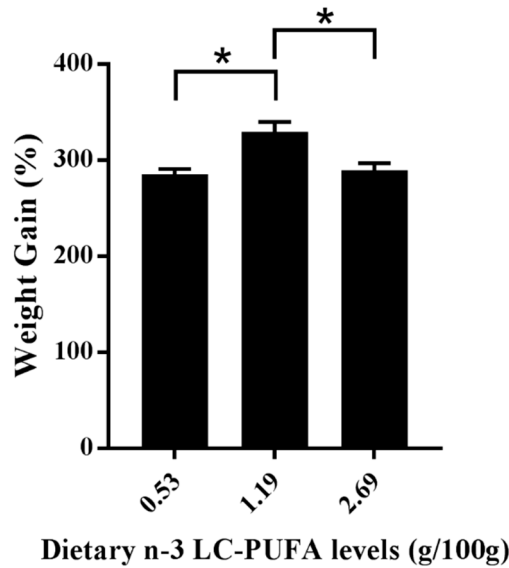

Figure S3. Effect of dietary n-3 LC-PUFA levels (g/100g) on weight gain (%) of hybrid grouper

ATGGGGAGTCGCTTTCTCTCCCCGCCTCTCAAGGTGACAAATGGAGACCTTCAATCATAAACTAAACACATACTTAGAGTCATGGATGG 90  
M E T F N H K L N T Y L E S W M 16  
GCCCCAGGGATCAGAGGGTGCAGGGATGGCTGCTGCTCGACAACTACCCACCAACCTTTGCACTCACAGTCATGTACCTTCTAATCGTGT 180  
G P R D Q R V R G W L L L D N Y P P T F A L T V M Y L L I V 46  
GGATGGGGCCCAAGTACATGAAACACAGACAGCCGTACTCCTGCAGAGGCCCTCTGGTGTCTTACAATCTGGGCCTCACACTCTTGTCT 270  
W M G P K Y M K H R Q P Y S C R G L L V L Y N L G L T L L S 76  
TCTACATGTTCTATGAGCTTGTACCGCGTGTGGCAGGTGGCTACAACCTTCTACTGCCAGGACACTCACAGTGCACAGGAAGTGGATA 360  
F Y M F Y E L V T A V W H G G Y N F Y C Q D T H S A Q E V D 106  
ATAAGATCATAAATGTCTGTGGTGGTACTACTTCTCCAAGCTCATCGAGTTCATGGACACCTTCTTCTTCACTACGAAAGAATAACC 450  
N K I I N V L W W Y Y F S K L I E F M D T F F F I L R K N N 136  
ACCAGATCACGTTTCTTACATCTACCACCACGCTAGCATGCTGAATATCTGGTGGTTCGTTATGAACTGGGTACCCTGCGGCCACTCAT 540  
H Q I T C F L H I Y H H A S M L N I W W F V M N W V P C G H S 166  
ACTTTGGCGCTCCCTAAACAGCTTCGTCCACGTCGTTATGTATCTTACTACGGCCTGTCAGCCATCCAGCCATCCGGCCGTACCTTT 630  
Y F G A S L N S F V H V V M Y S Y Y G L S A I P A I R P Y L 196  
GGTGAAGAAGTACATCACACAGTTTCAAGCTGATCCAGTTCTTTTAAACCATGTCGCAGACGATGTGCGCGGTCATATGGCCATGCGGCT 720  
W W K K Y I T Q F Q L I Q F F L T M S Q T M C A V I W P C G 226  
TCCCCAAGGGATGGCTGTACTTCCAAATAAGTTACATGGTCACACTCATCTTCTCTCAAACCTTCTACGTTCACTTACAAGAAGC 810  
F P K G W L Y F Q I S Y M V T L I F L F S N F Y V Q T Y K K 256  
ACAGTGGCTCTCTAAAGAAGGAGCACAAAACGGCTCTCCTGCATCTACAAATGGACATGCAAATGGGACGCCGTCAATGGAGCACACCG 900  
H S G S L K K E H Q N G S P A S T N G H A N G T P S M E H T 286  
CACACAAGAAGCTGAGGGTGGATTGACATTTGAGAAACCGCCACCAATTCTCACTGTAGCGTGTAGCTAATGCCGCTAGGAGGTTTAA 990  
A H K K L R V D - 294  
GTATCTTCTTATCTAGAATAGTTTAGCGCTCACATGAGATGAAATAAGCCATAGCCACATATATCCAGAGACTTTCATGTTTTTGCACA 1080  
CGTTCCTACTCATGGTATTTAATTATTAATGAATATTAGTATATAAGGAGAGTATTGTAGTATGGTTGCATAATATTGCTCCCCAAC 1170  
CCTCTAGAGGAAATTCATCTCCAAAAAATTCATCTCCAAAAAATTCATCTCCAAAAAATTCATCTCCAAAAAATTCATCTCCAAAAA 1226

Figure S4. Nucleotide and deduced amino acid sequence of Elov15 in hybrid grouper (GenBank accession number MZ713365). The nucleotide sequence is numbered from the first base at 5' end, started in codon (ATG) and stopped in codon (TGA). Four conserved motif of elongases are in gray; the putative histidine-rich domain (HXXHH) is in bold; the predicted seven (I-VII) putative membrane-spanning domains are underlined; the ER retrieval signal is wavy underlined.

```

ATGGGGGCTGATACTGGTTTGCCAGGTGGCGTTCAAAGGTTCTCCAGCGTGACGCTGCTCACTCACTTTTAACGGTAAAAACCTGCTG 90
CAAGGTGTGCATCATTTTCAGATGGCTTTTGCATGGCAAAGTGTCTGTCTGTGCACCAGAGGATAGTGGACAATGGAGACAAGAGGACG 180
          M A F A W Q S V L S V H Q R I V D N G D K R T 23
GACCCATGGCTGCTGGTCTACTCCCCGTCCCGGTGGCACTCATCTTCTCTAGTGTACCTCTGTGTGGTCTGGGCCGGCCCTCGTCTGATG 270
D P W L L V Y S P V P V A L I F L V Y L C V V W A G P R L M 53
AAACACAGAGAACCCGTTGACCTCAAAGTGGTTCTCATTGTTTACAACCTTGCCATGGTCGGCCTGTCTGCCTATATGTGCTATGAGTTC 360
K H R E P V D L K V V L I V Y N F A M V G L S A Y M C Y E F 83
CTGGTCACATCCTGGCTCTCGAGCTACAGCCTCCTCTGTGAGCCTGTAGATTACAGCACCAACCCGCTAGCATTGAGGATGGCCAGAGTC 450
L V T S W L S S Y S L L C Q P V D Y S T N P L A L R M A R V 113
TGCTGGTGGTTCTTCTCTCTAAGGTCATAGAGCTCAGTGACACCATCTTCTTCATTCTGAGGAAGAAGAAGCAGCCAGCTGACGTTTCCTT 540
C W W F F F S K V I E L S D T I F F I L R K K N S Q L T F L 143
CATGTTTACCACCACGGCACCATGATCTTCAACTGGTGGCGGGAGTCAAGTACGTGGCCGGCGGACAGTCGTTCTTCATCGGCCTGGTC 630
H V Y H H G T M I F N W W A G V K Y V A G G Q S F F I G L V 173
AACACCTTTGTTACATCGTGATGTATTCTTACTACGGCCTGGCTGCGCTCGGCCCTCACATGCAGAAGTACCTGTGGTGAAGAGATAC 720
N T F V H I V M Y S Y Y G L A A L G P H M Q K Y L W W K R Y 203
CTCACCTCTCTGCAGCTGGTGCAGTTTGTGCTGTTCTCCTGCACACGGGCTACAACCTGTTACAGAGTGCAGACTTCCCCGACTCCATG 810
L T S L Q L V Q F V L F L L H T G Y N L F T E C D F P D S M 233
AACGTGGTCGTGTTTGGTTACTGCGTCACCCCTCATCATCCTCTTTCAGTAACCTTCTATTTTTCAGAGCTACCTCAACAAGAAGAAGCAGAAA 900
N V V V F G Y C V T L I I L F S N F Y F Q S Y L N K K K Q K 263
TAAGACACAGTGATTGTGGAGCTTTATGAAACTGTGAACAGCCGAAAGAACACACCCCTAAGGATGGAGAAGGCAGAAGCACACTGCCG 990
-
CGATGAATGAGAAGAATCCAGAGACCCTCAGCAGAAAGTTCTCCCTCAGCTCCTTCAACACCGATGAAAAGGAATCTTGATGGTACTGTG 1080
TGTGAAAATCCTACACGGTGCCCTCTCATGCACATGTGCCTTACTGTCAAAGCATCACAGTGTGTTCTATGTTAAATGATTGTTATGGT 1170
CCATTACACAAAATAAAAAATACCATCAATTGAAAAAAAAAAAAAAAAAAAAAAAAAAAA 1228

```

**Figure S5.** Nucleotide and deduced amino acid sequence of Elovl8 in hybrid grouper (GenBank accession number MZ713364). The nucleotide sequence is numbered from the first base at 5' end, started in codon (ATG) and stopped in codon (TGA). The putative transmembrane regions are in gray; the putative histidine-rich domain (HXXHH) is in bold; the predicted seven (I-VII) putative membrane-spanning domains are underlined; the ER retrieval signal is wavy underlined.

ATAGGGGAATGAGTGGGTGAATGAGTCCGTGAACATATTAGACAAGACAAGAGGATGAATTTTGGGATGTTTACTATTGGAAATGACTGT 90  
 GACCGGAGCGGGAGCAGATAAAATGAGTCGGTGTGTCTAGTGTGACTGAAACCAAGGGAGAGTAGCCAAAATCTGGATACTGTGTCAAAC 180  
 TTGTGGCTGACTGGCCCTTTAGTGTTCAGGTGGACCCAGGCCAGAGACAGCAGTGAGGATGGGAGGTGGAGGCCAGCTGACGGAGCCAGG 270  
 M G G G G Q L T E P G 11  
 GGAGCAGAGCAGTGGGCGGGCTGGTGGTGTCTACACCTGGGAGGAGGTGCAGAGTCACTGCGACAGGAATGACCAGTGGCTGGTGATCGA 360  
 E Q S S G R A G G V Y T W E E V Q S H C D R N D Q W L V I D 41  
 TCGGAAGGTTTACAACATCACACAGTGGGCTAAAAGGCACCCAGGAGGGATCCGGGTTCATCAGCCACTACGCTGGAGAGGATGCCACGGA 450  
 R K V Y N I T Q W A K R H P G G I R V I S H Y A G E D A T E 71  
 GGCGTTACCGCTTTTCATCCTGATTTAAAGTTTGTGCAAAAGTTTCTGAAGCCCTGCTGATTGGAGAGCTGGCAGCGACAGAGCCAG 540  
 A F T A F H P D L K F V Q K F L K P L L I G E L A A T E P S 101  
 CCAGGACCGAGACAAAACGCAACAATCATACAAGATTTCCACACTTTACGGGTGCAAGCGGAGAGGGAGGGTTTGTTCAGCTCGGCC 630  
 Q D R D K N A T I I Q D F H T L R V Q A E R E G L F Q A R P 131  
 TTTGTTCTTCTGCCTCCACCTGGGTACATCCTGCTGCTGGAGGCCCTCGCCTGGCTCATCATCTGGGTCTGGGGAACAGCTGGACGCT 720  
 L F F C L H L G H I L L L E A L A W L I I W V W G T S W T L 161  
 GACGTTTCTGATCTCCTTCATGCTGGCGACCGCTCAGTTGCAGGCTGGATGGCTGCAGCAGCACTTTGGCCACCTGTCTGTCTCAAGAA 810  
 T F L I S F M L A T A Q L Q A G W L Q H D F G H L S V F K K 191  
 GTCCAGCTGGAATCACATATTGCACAAGTTTGCCATCGGCCATTTGAAGGGAGCGTCTGCCAAGTGGTGGATCACCGGCATTTCCAGCA 900  
 S S W N H I L H K F A I G H L K G A S A N W W N H R H F Q H 221  
 TCACGCTAAACCAACATCTTCAGTAAGGACCTGATGTCAACATGTTGCACATCTTTGTAGTTGGAACCACTCAACAGTGGAGTACGG 990  
 H A K P N I F S K D P D V N M L H I F V V G T T Q P V E Y G 251  
 CATAAAGAAGATTAAATATATGCCCTATCATCACCAACACCAGTACTTCTTTCTGTTGGACCACCGCTGCTCATTCCAGTCTACTTCCA 1080  
 I K K I K Y M P Y H H Q H Q Y F F L V G P P L L I P V Y F H 281  
 CATTTCAGATAATACGCACCATGATTTCCCGCCATGACTGGGTGGATCTGGCTTGGTCCATGTCTTACTACCTGCGCTACCTGTGCTGTTA 1170  
 I Q I I R T M I S R H D W V D L A W S M S Y Y L R Y L C C Y 311  
 CATTCCCATGTATGGCTGCTTGGCTCAGTGTGTCTCATCAGCTTTTGTGAGGTTTGTGGAGAGTCATTGGTTTGTGTGGGTGACTCAGAT 1260  
 I P M Y G L L G S V L L I S F V R F L E S H W F V W V T Q M 341  
 GAATCATCTACCAATGGACATCGACCACGAGAAGCACCAGGACTGGCTGTCCATGCAGCTACAAAGCCACCTGTAACATCAAACAATCCCC 1350  
 N H L P M D I D H E K H R D W L S M Q L Q A T C N I K Q S P 371  
 CTTCAATGACTGGTTTCAGTGGACACCTCAACTTTCAAATCGAACACCATTGTGTTCCACGATGCCGCGCCACAACCTACCACCTGGTGGC 1440  
 F N D W F S G H L N F Q I E H H L F P T M P R H N Y H L V A 401  
 CCCGCTGGTCCGTGCACTGTGTGAGAAACATGGGATTCCATACCAGGTGAAAACACTGTGGCGAGGCATCACTGATGTTTTTCATCTCATT 1530  
 P L V R A L C E K H G I P Y Q V K T L W R G I T D V F I S L 431  
 GAAGAAGTCAAGTGACCTCTGGCTCGACGCATATCTCCATAAATGACCAGTTTTATTCTCGACACGACAAGGAGTGATGTTGTTTCTCCT 1620  
 K N S G D L W L D A Y L H K - 445  
 CTTTTGCATCATAAACTGATTGTATCTGTTTGGTTTTATAATTCAAGTTGATAGTGTGGGAATGATCTTTTCTTAGCTCCGGTGTATAGT 1710  
 TCAGTCTTTTTTAGATTCTGTGCCGGGTTTTAGTGCTCACAGGATTTCCCTGGTTGCCTTACAGTGTCTTGAACAACCTGTAGTATGGTG 1800  
 TTGTAGGTGCAGCTGTGAAACTGATGTGAGGTATTTAAAGTGATGTTTTTTCATTATCTATCATGAACAATAAAATATGACAAATCCTGT 1890  
 ATAAGTGAAGTATTAGTTATAGTTAATTTAACTTCTTTACTTGCAACTCTTGTTCTGCTCTGTTTCTGTTTAAATAAAGGAACGTATAAA 1980  
 AAAAAAAAAAAAAAAAAAAAAAAAAA 2006

**Figure S6.** Nucleotide and deduced amino acid sequence of Fads2 in hybrid grouper (GenBank accession number MZ713366). The nucleotide sequence is numbered from the first base at the 5' end, started in codon (ATG) and stopped in codon (TGA). The Cytochrome b5-like Heme/Steroid binding domain is in gray; the putative histidine-rich domain (HXXHH, HDXGH and QXXHH) is in bold; the predicted four (I-IV) putative membrane-spanning domains are underlined.
